# Supplementary material for: Knowledge diffusion within a large conservation organization and beyond
Source: PLOS journal article supplement (doi:10.1371/journal.pone.0193716), 2018-03-01
Supplement: S2 (10.1371/journal.pone.0193716.s002) [file journal.pone.0193716.s002]

## Default Question Block

For best results, please use Firefox or Internet Explorer browsers.

Dear Colleagues,

The Nature Conservancy (TNC) respectfully requests your time in responding to the following survey.

This survey is for a project to understand how ideas and practices diffuse within TNC. We are not evaluating the effectiveness of you or any program with which you are affiliated. This work will help TNC better understand how conservation practices are spread and adopted.

We plan to collect the following data as part of this research:

1. This 15-20 minute survey
2. Follow up interviews for a small subset of respondents
3. Some administrative data generated from TNC systems, such as the operating unit and geographical region to which you belong

Completing this survey indicates your consent as a participant in this study. Participating in this study is voluntary, and all data collected will be confidential. All information you provide will be de-identified and it will not be linked back to you. Data may be used for future publications, but because all analyses will use de-identified data and aggregate at the group level, this further ensures that no data can be linked to you.

Please select one of the options below.

- ☐ Yes, I voluntarily agree to participate in this research.
- ☐ No, I do not choose to participate in this research.

## Block A and B1

**QUESTIONS A1-A3 ASK ABOUT YOUR BASIC DEMOGRAPHIC INFORMATION AND EDUCATIONAL HISTORY.**

**A1. Please indicate your gender below.**

- ☐ Male
- ☐ Female

**A2. Please indicate your age below.**

|     |  |                      |
|-----|--|----------------------|
| Age |  | Years                |
|     |  | <input type="text"/> |

**A3. What is the highest level of education you have completed?**

- ☐ Less than High School
- ☐ High School/GED
- ☐ Some college
- ☐ 2 year College Degree
- ☐ 4 year College Degree
- ☐ Master's Degree
- ☐ Doctoral Degree
- ☐ Professional Degree (e.g. JD/MD)

**QUESTIONS A4-A5 ASK MORE SPECIFICALLY ABOUT YOUR EDUCATIONAL TRAINING.****A4. Please indicate any formal training you have received and the subject and major of study.  
Please select your subject and choose your major from the pull down options below.**

Subject

Major

**A5. Please indicate any other formal training you have received and the subject and major of study.  
Please select your subject and choose your major from the pull down options below.**

Subject

Major

**QUESTIONS A6-A7 ASK ABOUT YOUR CURRENT POSITION AND YOUR PRIOR PROFESSIONAL EXPERIENCE.****A6. As of January 2015, how many years have you worked in your current position at TNC?**

|                                  |                      |
|----------------------------------|----------------------|
|                                  | Years                |
| Years worked in current position | <input type="text"/> |

**A7. How many years, including your time within TNC, have you worked in conservation?**

|                              |                      |
|------------------------------|----------------------|
|                              | Years                |
| Years worked in conservation | <input type="text"/> |

THE FOLLOWING B1-B2 ITEMS ASK QUESTIONS REGARDING YOUR COLLEGIAL RELATIONSHIPS.

Please note: we will not identify you or share your responses to these survey questions with your colleagues.

B1. Please list up to fifteen of your closest colleagues (those people from whom you seek advice or with whom you frequently interact within a professional context) within TNC and the frequency of your interaction. You do not need to fill in all of the blanks.

Names will autofill as you type. Begin, by typing the last name of your colleague, then first name.

|                           | Yearly                | Monthly               | Weekly                | Daily                 |
|---------------------------|-----------------------|-----------------------|-----------------------|-----------------------|
| Full Name of Colleague 1  | <input type="radio"/> | <input type="radio"/> | <input type="radio"/> | <input type="radio"/> |
| Full Name of Colleague 2  | <input type="radio"/> | <input type="radio"/> | <input type="radio"/> | <input type="radio"/> |
| Full Name of Colleague 3  | <input type="radio"/> | <input type="radio"/> | <input type="radio"/> | <input type="radio"/> |
| Full Name of Colleague 4  | <input type="radio"/> | <input type="radio"/> | <input type="radio"/> | <input type="radio"/> |
| Full Name of Colleague 5  | <input type="radio"/> | <input type="radio"/> | <input type="radio"/> | <input type="radio"/> |
| Full Name of Colleague 6  | <input type="radio"/> | <input type="radio"/> | <input type="radio"/> | <input type="radio"/> |
| Full Name of Colleague 7  | <input type="radio"/> | <input type="radio"/> | <input type="radio"/> | <input type="radio"/> |
| Full Name of Colleague 8  | <input type="radio"/> | <input type="radio"/> | <input type="radio"/> | <input type="radio"/> |
| Full Name of Colleague 9  | <input type="radio"/> | <input type="radio"/> | <input type="radio"/> | <input type="radio"/> |
| Full Name of Colleague 10 | <input type="radio"/> | <input type="radio"/> | <input type="radio"/> | <input type="radio"/> |
| Full Name of Colleague 11 | <input type="radio"/> | <input type="radio"/> | <input type="radio"/> | <input type="radio"/> |
| Full Name of Colleague 12 | <input type="radio"/> | <input type="radio"/> | <input type="radio"/> | <input type="radio"/> |
| Full Name of Colleague 13 | <input type="radio"/> | <input type="radio"/> | <input type="radio"/> | <input type="radio"/> |
| Full Name of Colleague 14 | <input type="radio"/> | <input type="radio"/> | <input type="radio"/> | <input type="radio"/> |
| Full Name of Colleague 15 | <input type="radio"/> | <input type="radio"/> | <input type="radio"/> | <input type="radio"/> |

Block B2

B2. Please identify general areas of communication or collaboration below.  
(Please choose all that apply)

|                                     | Is this a person with whom you consult or seek advice? | What type of work do you communicate with this person about?<br>(check all that apply) |                                 |                                     |                          | Please indicate if you have done the following with this person:<br>(check all that apply) |                                     |                                        |
|-------------------------------------|--------------------------------------------------------|----------------------------------------------------------------------------------------|---------------------------------|-------------------------------------|--------------------------|--------------------------------------------------------------------------------------------|-------------------------------------|----------------------------------------|
|                                     | Yes                                                    | Science                                                                                | Conservation Program Activities | Fundraising or Proposal Development | Management               | Attended Any Training                                                                      | Shared data, reports or methodology | Partnered or collaborated on a project |
| {q://QID98/ChoiceTextEntryValue/1}  | <input type="checkbox"/>                               | <input type="checkbox"/>                                                               | <input type="checkbox"/>        | <input type="checkbox"/>            | <input type="checkbox"/> | <input type="checkbox"/>                                                                   | <input type="checkbox"/>            | <input type="checkbox"/>               |
| {q://QID98/ChoiceTextEntryValue/2}  | <input type="checkbox"/>                               | <input type="checkbox"/>                                                               | <input type="checkbox"/>        | <input type="checkbox"/>            | <input type="checkbox"/> | <input type="checkbox"/>                                                                   | <input type="checkbox"/>            | <input type="checkbox"/>               |
| {q://QID98/ChoiceTextEntryValue/3}  | <input type="checkbox"/>                               | <input type="checkbox"/>                                                               | <input type="checkbox"/>        | <input type="checkbox"/>            | <input type="checkbox"/> | <input type="checkbox"/>                                                                   | <input type="checkbox"/>            | <input type="checkbox"/>               |
| {q://QID98/ChoiceTextEntryValue/4}  | <input type="checkbox"/>                               | <input type="checkbox"/>                                                               | <input type="checkbox"/>        | <input type="checkbox"/>            | <input type="checkbox"/> | <input type="checkbox"/>                                                                   | <input type="checkbox"/>            | <input type="checkbox"/>               |
| {q://QID98/ChoiceTextEntryValue/5}  | <input type="checkbox"/>                               | <input type="checkbox"/>                                                               | <input type="checkbox"/>        | <input type="checkbox"/>            | <input type="checkbox"/> | <input type="checkbox"/>                                                                   | <input type="checkbox"/>            | <input type="checkbox"/>               |
| {q://QID98/ChoiceTextEntryValue/6}  | <input type="checkbox"/>                               | <input type="checkbox"/>                                                               | <input type="checkbox"/>        | <input type="checkbox"/>            | <input type="checkbox"/> | <input type="checkbox"/>                                                                   | <input type="checkbox"/>            | <input type="checkbox"/>               |
| {q://QID98/ChoiceTextEntryValue/7}  | <input type="checkbox"/>                               | <input type="checkbox"/>                                                               | <input type="checkbox"/>        | <input type="checkbox"/>            | <input type="checkbox"/> | <input type="checkbox"/>                                                                   | <input type="checkbox"/>            | <input type="checkbox"/>               |
| {q://QID98/ChoiceTextEntryValue/8}  | <input type="checkbox"/>                               | <input type="checkbox"/>                                                               | <input type="checkbox"/>        | <input type="checkbox"/>            | <input type="checkbox"/> | <input type="checkbox"/>                                                                   | <input type="checkbox"/>            | <input type="checkbox"/>               |
| {q://QID98/ChoiceTextEntryValue/9}  | <input type="checkbox"/>                               | <input type="checkbox"/>                                                               | <input type="checkbox"/>        | <input type="checkbox"/>            | <input type="checkbox"/> | <input type="checkbox"/>                                                                   | <input type="checkbox"/>            | <input type="checkbox"/>               |
| {q://QID98/ChoiceTextEntryValue/10} | <input type="checkbox"/>                               | <input type="checkbox"/>                                                               | <input type="checkbox"/>        | <input type="checkbox"/>            | <input type="checkbox"/> | <input type="checkbox"/>                                                                   | <input type="checkbox"/>            | <input type="checkbox"/>               |
| {q://QID98/ChoiceTextEntryValue/11} | <input type="checkbox"/>                               | <input type="checkbox"/>                                                               | <input type="checkbox"/>        | <input type="checkbox"/>            | <input type="checkbox"/> | <input type="checkbox"/>                                                                   | <input type="checkbox"/>            | <input type="checkbox"/>               |
| {q://QID98/ChoiceTextEntryValue/12} | <input type="checkbox"/>                               | <input type="checkbox"/>                                                               | <input type="checkbox"/>        | <input type="checkbox"/>            | <input type="checkbox"/> | <input type="checkbox"/>                                                                   | <input type="checkbox"/>            | <input type="checkbox"/>               |
| {q://QID98/ChoiceTextEntryValue/13} | <input type="checkbox"/>                               | <input type="checkbox"/>                                                               | <input type="checkbox"/>        | <input type="checkbox"/>            | <input type="checkbox"/> | <input type="checkbox"/>                                                                   | <input type="checkbox"/>            | <input type="checkbox"/>               |
| {q://QID98/ChoiceTextEntryValue/14} | <input type="checkbox"/>                               | <input type="checkbox"/>                                                               | <input type="checkbox"/>        | <input type="checkbox"/>            | <input type="checkbox"/> | <input type="checkbox"/>                                                                   | <input type="checkbox"/>            | <input type="checkbox"/>               |
| {q://QID98/ChoiceTextEntryValue/15} | <input type="checkbox"/>                               | <input type="checkbox"/>                                                               | <input type="checkbox"/>        | <input type="checkbox"/>            | <input type="checkbox"/> | <input type="checkbox"/>                                                                   | <input type="checkbox"/>            | <input type="checkbox"/>               |

**Block B3**

**B3. Please list up to fifteen of your colleagues within TNC that have communicated with you about the **CbD 2.0 Guidance** and/or the **Human Well-Being and Conservation Tutorial (HWB Tutorial)**. You do not need to fill in all of the blanks.**

**Communications can include email, phone, and in-person conversations. Communications could come from your colleague or from you.**

**Names will autofill as you type. Begin, by typing the last name of your colleague, then first name.**

|                                                   | CbD 2.0 Guidance                                                       |                                                                  | HWB Tutorial                                                           |                                                                  |
|---------------------------------------------------|------------------------------------------------------------------------|------------------------------------------------------------------|------------------------------------------------------------------------|------------------------------------------------------------------|
|                                                   | Heard about CbD 2.0 Guidance from this person (in-person or virtually) | Told this person about CbD 2.0 Guidance (in-person or virtually) | Heard about the HWB Tutorial from this person (in-person or virtually) | Told this person about the HWB Tutorial (in-person or virtually) |
| Full Name of Colleague 1<br><input type="text"/>  | <input type="radio"/>                                                  | <input type="radio"/>                                            | <input type="radio"/>                                                  | <input type="radio"/>                                            |
| Full Name of Colleague 2<br><input type="text"/>  | <input type="radio"/>                                                  | <input type="radio"/>                                            | <input type="radio"/>                                                  | <input type="radio"/>                                            |
| Full Name of Colleague 3<br><input type="text"/>  | <input type="radio"/>                                                  | <input type="radio"/>                                            | <input type="radio"/>                                                  | <input type="radio"/>                                            |
| Full Name of Colleague 4<br><input type="text"/>  | <input type="radio"/>                                                  | <input type="radio"/>                                            | <input type="radio"/>                                                  | <input type="radio"/>                                            |
| Full Name of Colleague 5<br><input type="text"/>  | <input type="radio"/>                                                  | <input type="radio"/>                                            | <input type="radio"/>                                                  | <input type="radio"/>                                            |
| Full Name of Colleague 6<br><input type="text"/>  | <input type="radio"/>                                                  | <input type="radio"/>                                            | <input type="radio"/>                                                  | <input type="radio"/>                                            |
| Full Name of Colleague 7<br><input type="text"/>  | <input type="radio"/>                                                  | <input type="radio"/>                                            | <input type="radio"/>                                                  | <input type="radio"/>                                            |
| Full Name of Colleague 8<br><input type="text"/>  | <input type="radio"/>                                                  | <input type="radio"/>                                            | <input type="radio"/>                                                  | <input type="radio"/>                                            |
| Full Name of Colleague 9<br><input type="text"/>  | <input type="radio"/>                                                  | <input type="radio"/>                                            | <input type="radio"/>                                                  | <input type="radio"/>                                            |
| Full Name of Colleague 10<br><input type="text"/> | <input type="radio"/>                                                  | <input type="radio"/>                                            | <input type="radio"/>                                                  | <input type="radio"/>                                            |
| Full Name of Colleague 11<br><input type="text"/> | <input type="radio"/>                                                  | <input type="radio"/>                                            | <input type="radio"/>                                                  | <input type="radio"/>                                            |
| Full Name of Colleague 12<br><input type="text"/> | <input type="radio"/>                                                  | <input type="radio"/>                                            | <input type="radio"/>                                                  | <input type="radio"/>                                            |
| Full Name of Colleague 13<br><input type="text"/> | <input type="radio"/>                                                  | <input type="radio"/>                                            | <input type="radio"/>                                                  | <input type="radio"/>                                            |
| Full Name of Colleague 14<br><input type="text"/> | <input type="radio"/>                                                  | <input type="radio"/>                                            | <input type="radio"/>                                                  | <input type="radio"/>                                            |
| Full Name of Colleague 15<br><input type="text"/> | <input type="radio"/>                                                  | <input type="radio"/>                                            | <input type="radio"/>                                                  | <input type="radio"/>                                            |

Block C1

C1. Please indicate if in the **past 12 months** you have engaged in the following activities when *leading, developing, or adaptively managing conservation efforts*.

|                                                                                                                | Yes                      |
|----------------------------------------------------------------------------------------------------------------|--------------------------|
| <b>Analyze and identify new opportunities by conducting:</b>                                                   |                          |
| A situation analysis that includes considerations for people and nature                                        | <input type="checkbox"/> |
| Strategy and opportunity mapping                                                                               | <input type="checkbox"/> |
| An ecoregional assessment                                                                                      | <input type="checkbox"/> |
| Gap analysis                                                                                                   | <input type="checkbox"/> |
| Biodiversity or habitat status, threats, or thresholds assessments                                             | <input type="checkbox"/> |
| Ecosystem service targets, or threats assessments                                                              | <input type="checkbox"/> |
| Analysis of political, economic, and social factors conducive for conservation work                            | <input type="checkbox"/> |
| Analysis of conservation priorities based on multi-objective criteria (e.g., nature and people considerations) | <input type="checkbox"/> |
| Some type of systematic review or synthesis of the peer reviewed, grey, and white literature                   | <input type="checkbox"/> |
| Stakeholder analysis that includes explicit consideration of all relevant groups that will be affected         | <input type="checkbox"/> |
| <b>Conduct field research or modeling to:</b>                                                                  |                          |
| Support development/testing of strategies                                                                      | <input type="checkbox"/> |
| Identify new conservation targets, threats, and trade-offs                                                     | <input type="checkbox"/> |
| Develop innovative methods                                                                                     | <input type="checkbox"/> |

Please indicate the percent of time you spend *leading, developing, or adaptively managing conservation efforts* (i.e., all of the items above) .

|                                                                                     | Percentage of time             |
|-------------------------------------------------------------------------------------|--------------------------------|
| Engaging in <i>leading, developing, or adaptively managing conservation efforts</i> | <input type="text" value="0"/> |

Block C2

**C2. Please indicate if in the past 12 months you have engaged in the following activities when *analyzing and building evidence for conservation*.**

|                                                                                                                                       | Yes                      |
|---------------------------------------------------------------------------------------------------------------------------------------|--------------------------|
| <b>Identify conservation opportunities by conducting or participating in:</b>                                                         |                          |
| Developing a Conservation Action Plan (CAP)                                                                                           | <input type="checkbox"/> |
| Creating a Conservation Business Plan                                                                                                 | <input type="checkbox"/> |
| Developing theory of change linked and informed by data (e.g., grey, white, peer reviewed literature, key informant interviews, etc.) | <input type="checkbox"/> |
| Developing a theory of change or results chain articulating how conservation strategies can negatively or positively impact people    | <input type="checkbox"/> |
| <b>Evaluate alternative strategies for taking advantage of conservation opportunities by:</b>                                         |                          |
| Reading the conservation literature (e.g., government or policy reports, peer reviewed literature)                                    | <input type="checkbox"/> |
| Consulting with trusted friends and colleagues                                                                                        | <input type="checkbox"/> |
| Monitoring by field research or modeling                                                                                              | <input type="checkbox"/> |
| Conducting original research to identify new conservation targets, threats, and trade-offs                                            | <input type="checkbox"/> |
| Facilitating conversations about people and nature                                                                                    | <input type="checkbox"/> |
| <b>Evaluate the effect or impact of conservation outcomes by:</b>                                                                     |                          |
| Qualitative assessment (e.g., key informant interviews, focus groups, administrative documents or photographs)                        | <input type="checkbox"/> |
| Quantitative monitoring to detect trends or impact                                                                                    | <input type="checkbox"/> |
| Updating strategic plan after acquiring new information                                                                               | <input type="checkbox"/> |
| Develop indicators for human well-being outcomes related to a conservation strategy                                                   | <input type="checkbox"/> |
| Analyzing socioeconomic data                                                                                                          | <input type="checkbox"/> |

Please indicate the percent of time you spend *analyzing and building evidence for conservation* (i.e., all of the items above).

**Please note: These percentages do not need to sum to 100%.**

|                                                                     | Percentage of time             |
|---------------------------------------------------------------------|--------------------------------|
| Engaging in <i>analyzing and building evidence for conservation</i> | <input type="text" value="0"/> |

Block C3

**C3. Please indicate if in the past 12 months you have engaged in these aspects of *communicating conservation science and activities*.**

|                                                                                                                | Yes                      |
|----------------------------------------------------------------------------------------------------------------|--------------------------|
| <b>Share science or technical information:</b>                                                                 |                          |
| Within TNC                                                                                                     | <input type="checkbox"/> |
| Other conservation entities                                                                                    | <input type="checkbox"/> |
| Other audiences (e.g. corporations, non-conservation oriented government, academic departments, or NGOs)       | <input type="checkbox"/> |
| <b>Build capacity with internal and external audiences on methods, tools and/or best practices related to:</b> |                          |
| Conservation priorities and strategies                                                                         | <input type="checkbox"/> |
| Human well-being outcomes or impacts of our work                                                               | <input type="checkbox"/> |
| Nature conservation outcomes or impacts of our work                                                            | <input type="checkbox"/> |
| Innovative technical or scientific methods and tools                                                           | <input type="checkbox"/> |
| Equity or the consideration of traditionally disadvantaged stakeholders                                        | <input type="checkbox"/> |
| <b>Promote conservation work to:</b>                                                                           |                          |
| Facilitate conversations about people and nature strategies and outcomes                                       | <input type="checkbox"/> |
| Incorporate cross- or multi-disciplinary knowledge                                                             | <input type="checkbox"/> |
| Establish new partnerships with outside organizations to address new disciplinary perspectives and expertise   | <input type="checkbox"/> |
| Raise additional funds for existing or new projects                                                            | <input type="checkbox"/> |
| Audiences outside of conservation                                                                              | <input type="checkbox"/> |
| Coordinate learning exchanges and conferences                                                                  | <input type="checkbox"/> |

**Please indicate the percent of time you spend engaging in practices related to *communication of conservation science and activities* (i.e., all of the items above)**

***Please note: These percentages do not need to sum to 100%.***

|                                                                                  | Percentage of time             |
|----------------------------------------------------------------------------------|--------------------------------|
| Engaging in practices related to <i>communication of conservation activities</i> | <input type="text" value="0"/> |

Block C4



C4. Please indicate if in the past 12 months, you have engaged in these aspects of *conservation management*.

|                                                                                                                                     | Yes                      |
|-------------------------------------------------------------------------------------------------------------------------------------|--------------------------|
| <b>Developed and led:</b>                                                                                                           |                          |
| Conservation visioning exercises                                                                                                    | <input type="checkbox"/> |
| Efforts to build an evidence base to inform strategies and priorities                                                               | <input type="checkbox"/> |
| Effort to consider how the Human Subjects Research SOP applies to your work and what, if any, actions need to be taken              | <input type="checkbox"/> |
| <b>Cultivated:</b>                                                                                                                  |                          |
| Partnerships with other conservation or natural resource management organizations and government agencies                           | <input type="checkbox"/> |
| Partnerships with non-conservation oriented organizations, such as corporations, governments or academic departments, or other NGOs | <input type="checkbox"/> |
| Non-conservation oriented audiences for fundraising                                                                                 | <input type="checkbox"/> |
| Fundraising support to build an evidence base                                                                                       | <input type="checkbox"/> |

Please indicate the percent of time you spend engaging in practices related to *conservation management* (i.e., all of the items above)

Please note: These percentages do not need to sum to 100%.

|                                                                 | Percentage of time             |
|-----------------------------------------------------------------|--------------------------------|
| Engaging in practices related to <i>conservation management</i> | <input type="text" value="0"/> |

Block D

THE FOLLOWING ITEM, D1, ASKS ABOUT YOUR PERCEPTIONS AND WORK RELATED PRACTICES.

**D1. I use the following sources to acquire information on conservation practice and science to share with others:**

|                                                                                           | Never or almost<br>never | 1-3 times per year    | 1-3 times per<br>month | 1-3 times per week    |
|-------------------------------------------------------------------------------------------|--------------------------|-----------------------|------------------------|-----------------------|
| Peer reviewed scientific literature                                                       | <input type="radio"/>    | <input type="radio"/> | <input type="radio"/>  | <input type="radio"/> |
| Reports, white papers, grey literature                                                    | <input type="radio"/>    | <input type="radio"/> | <input type="radio"/>  | <input type="radio"/> |
| Popular articles, news stories, blogs,<br>and other news sources                          | <input type="radio"/>    | <input type="radio"/> | <input type="radio"/>  | <input type="radio"/> |
| Internal conferences, trainings (e.g.,<br>from Learn@TNC), or other training<br>workshops | <input type="radio"/>    | <input type="radio"/> | <input type="radio"/>  | <input type="radio"/> |
| CONNECT or ReCONNECT Staff<br>News Emails                                                 | <input type="radio"/>    | <input type="radio"/> | <input type="radio"/>  | <input type="radio"/> |
| Discussions with colleagues within<br>TNC                                                 | <input type="radio"/>    | <input type="radio"/> | <input type="radio"/>  | <input type="radio"/> |
| Discussions with colleagues outside<br>TNC                                                | <input type="radio"/>    | <input type="radio"/> | <input type="radio"/>  | <input type="radio"/> |
| Electronic newsletters and listserv                                                       | <input type="radio"/>    | <input type="radio"/> | <input type="radio"/>  | <input type="radio"/> |
| Print outreach and communication<br>materials                                             | <input type="radio"/>    | <input type="radio"/> | <input type="radio"/>  | <input type="radio"/> |
| Other non-profit nature organizations                                                     | <input type="radio"/>    | <input type="radio"/> | <input type="radio"/>  | <input type="radio"/> |
| Other (if so, please specify below)<br><input type="text"/>                               | <input type="radio"/>    | <input type="radio"/> | <input type="radio"/>  | <input type="radio"/> |

**Block E****QUESTION E1 EXPLORES WHAT CONSERVATION MEANS TO YOU.**

**E1. These questions ask about your thoughts on *conservation organizations*, which are organizations that protect, preserve, or restore nature. Please indicate your extent of agreement to the following statements.**

|                                                                                                   | Strongly<br>Disagree  | Disagree              | Agree                 | Strongly<br>Agree     | Don't<br>Know         |
|---------------------------------------------------------------------------------------------------|-----------------------|-----------------------|-----------------------|-----------------------|-----------------------|
| Conservation organizations can protect the environment and improve human well-being               | <input type="radio"/> | <input type="radio"/> | <input type="radio"/> | <input type="radio"/> | <input type="radio"/> |
| Projects to increase biodiversity should only be done when they increase human well-being.        | <input type="radio"/> | <input type="radio"/> | <input type="radio"/> | <input type="radio"/> | <input type="radio"/> |
| The environment should be protected even if it decreases human well-being.                        | <input type="radio"/> | <input type="radio"/> | <input type="radio"/> | <input type="radio"/> | <input type="radio"/> |
| The environment can be protected without affecting human well-being                               | <input type="radio"/> | <input type="radio"/> | <input type="radio"/> | <input type="radio"/> | <input type="radio"/> |
| Protecting the environment should only be done when it also increases human well-being.           | <input type="radio"/> | <input type="radio"/> | <input type="radio"/> | <input type="radio"/> | <input type="radio"/> |
| Conservation organizations should only protect the environment when it improves human well-being. | <input type="radio"/> | <input type="radio"/> | <input type="radio"/> | <input type="radio"/> | <input type="radio"/> |
| Projects to protect the environment should do so even at the cost of human well-being.            | <input type="radio"/> | <input type="radio"/> | <input type="radio"/> | <input type="radio"/> | <input type="radio"/> |

## Block F

**QUESTIONS F1 AND F2 EXPLORE WHAT AREAS YOUR WORK INVOLVE.**
**F1. What Whole System and North American Regional (NAR) Priorities does your work involve?**

**Please select all the Whole Systems and NAR Priorities you are involved in. If you are not involved in any Whole System and NAR priority, please select *not applicable***

|                                                        | My work involves this Whole System or NAR Priority |
|--------------------------------------------------------|----------------------------------------------------|
| Not applicable (N/A)                                   | <input type="checkbox"/>                           |
| Advance integrated ocean and coastal management (IOCM) | <input type="checkbox"/>                           |
| Atlantic Sound                                         | <input type="checkbox"/>                           |
| Canadian Boreal Forest                                 | <input type="checkbox"/>                           |
| Caribbean Coasts and Marine Protected Areas            | <input type="checkbox"/>                           |
| Central Appalachian Mountains                          | <input type="checkbox"/>                           |
| Central Great Plains Grasslands                        | <input type="checkbox"/>                           |
| Chesapeake Bay                                         | <input type="checkbox"/>                           |
| Colorado River Basin                                   | <input type="checkbox"/>                           |
| Connecticut River                                      | <input type="checkbox"/>                           |
| Crown of the Continent                                 | <input type="checkbox"/>                           |
| Emerald Edge                                           | <input type="checkbox"/>                           |
| Everglades                                             | <input type="checkbox"/>                           |
| Great Lakes                                            | <input type="checkbox"/>                           |
| Gulf of Mexico                                         | <input type="checkbox"/>                           |
| Hawaiian Island Ecosystems                             | <input type="checkbox"/>                           |
| Longleaf Pine Forests                                  | <input type="checkbox"/>                           |
| Mississippi River                                      | <input type="checkbox"/>                           |
| Mojave Desert Ecoregion                                | <input type="checkbox"/>                           |
| Promote integrated water resource management           | <input type="checkbox"/>                           |
| Puget Sound                                            | <input type="checkbox"/>                           |
| Restore America's forests                              | <input type="checkbox"/>                           |
| Restore coastal fisheries for people and nature        | <input type="checkbox"/>                           |
| Secure benefits to nature from energy development      | <input type="checkbox"/>                           |
| Urban conservation in North America cities             | <input type="checkbox"/>                           |

**F2. What Global Challenges Global Solutions (GCGS) areas and/or North American Regional project does your work involve?**

**Please select all Global Challenges Global Solutions (GCGS) and/or North American Regional project you are involved in. If you are not involved in any GCGS or North American Regional project, please select *not applicable*.**

|                                    | My work involves this GCGS or North American Regional project |
|------------------------------------|---------------------------------------------------------------|
| Not applicable (N/A)               | <input type="checkbox"/>                                      |
| Climate and Energy                 | <input type="checkbox"/>                                      |
| Climate Risk & Resilience          | <input type="checkbox"/>                                      |
| Indigenous & Communal Conservation | <input type="checkbox"/>                                      |
| Development by Design              | <input type="checkbox"/>                                      |
| Forests and Climate                | <input type="checkbox"/>                                      |
| Global Fisheries                   | <input type="checkbox"/>                                      |
| Great Rivers                       | <input type="checkbox"/>                                      |
| Ocean Solutions                    | <input type="checkbox"/>                                      |
| Securing Water                     | <input type="checkbox"/>                                      |
| Global Agriculture                 | <input type="checkbox"/>                                      |
| Resilient Cities                   | <input type="checkbox"/>                                      |

#### Block G

**QUESTIONS G1-G8 ASK ABOUT CbD 2.0. THIS INCLUDES THE **OVERVIEW DOCUMENT** RELEASED IN MARCH 2015, AS WELL AS THE **GUIDANCE DOCUMENT** RELEASED IN MARCH 2016.**

**G1. Please tell us if you do the following as a result of CbD 2.0**

|                                                                                                | Yes                   | No                    | Don't Know            | Already practiced before CbD 2.0 |
|------------------------------------------------------------------------------------------------|-----------------------|-----------------------|-----------------------|----------------------------------|
| Incorporate evidence in the conservation planning process                                      | <input type="radio"/> | <input type="radio"/> | <input type="radio"/> | <input type="radio"/>            |
| Incorporate uncertainty in the conservation planning process                                   | <input type="radio"/> | <input type="radio"/> | <input type="radio"/> | <input type="radio"/>            |
| Use Human Subjects SOP                                                                         | <input type="radio"/> | <input type="radio"/> | <input type="radio"/> | <input type="radio"/>            |
| Measure our impacts on people                                                                  | <input type="radio"/> | <input type="radio"/> | <input type="radio"/> | <input type="radio"/>            |
| Use standards of measurement (e.g., SMART) for monitoring and evaluating our impacts on people | <input type="radio"/> | <input type="radio"/> | <input type="radio"/> | <input type="radio"/>            |

**G2. How much have you engaged in the following practices since CbD 2.0 was introduced?**

|                                                                                                | More                  | Less                  | The same              |
|------------------------------------------------------------------------------------------------|-----------------------|-----------------------|-----------------------|
| Incorporate evidence in the conservation planning process                                      | <input type="radio"/> | <input type="radio"/> | <input type="radio"/> |
| Incorporate uncertainty in the conservation planning process                                   | <input type="radio"/> | <input type="radio"/> | <input type="radio"/> |
| Use Human Subjects SOP                                                                         | <input type="radio"/> | <input type="radio"/> | <input type="radio"/> |
| Measure our impacts on people                                                                  | <input type="radio"/> | <input type="radio"/> | <input type="radio"/> |
| Use standards of measurement (e.g., SMART) for monitoring and evaluating our impacts on people | <input type="radio"/> | <input type="radio"/> | <input type="radio"/> |

**G3. How has your OU diversified the number of funding sources in the past 12 months?**

- ☐ More
- ☐ Less
- ☐ The same
- ☐ Don't know

**G4. How many external partners (e.g., agencies or organizations) have you worked with in the past 12 months?****G5. How much have you shared CbD 2.0 knowledge or guidance with outside collaborators?**

|                   | None (0)              | A Little (1-3 people) | Some (4-6 people)     | A Lot (7+ people)     |
|-------------------|-----------------------|-----------------------|-----------------------|-----------------------|
| Degree of sharing | <input type="radio"/> | <input type="radio"/> | <input type="radio"/> | <input type="radio"/> |

**G6. These questions ask about how CbD 2.0 influenced your work. Please indicate the extent you agree with the following statements.**

|                                                                                                    | Strongly Disagree     | Disagree              | Agree                 | Strongly Agree        |
|----------------------------------------------------------------------------------------------------|-----------------------|-----------------------|-----------------------|-----------------------|
| Your outside collaborators engage in practices consistent with CbD 2.0                             | <input type="radio"/> | <input type="radio"/> | <input type="radio"/> | <input type="radio"/> |
| Applying the CbD 2.0 approach has increased the types of activities we do that can be funded       | <input type="radio"/> | <input type="radio"/> | <input type="radio"/> | <input type="radio"/> |
| Applying the CbD 2.0 approach has increased the number of partners we can work with outside of TNC | <input type="radio"/> | <input type="radio"/> | <input type="radio"/> | <input type="radio"/> |
| Applying the CbD 2.0 approach has increased the number of constituents we serve                    | <input type="radio"/> | <input type="radio"/> | <input type="radio"/> | <input type="radio"/> |
| Applying the CbD 2.0 approach has increased the expertise we have access to                        | <input type="radio"/> | <input type="radio"/> | <input type="radio"/> | <input type="radio"/> |
| Applying the CbD 2.0 approach has increased our funding sources.                                   | <input type="radio"/> | <input type="radio"/> | <input type="radio"/> | <input type="radio"/> |
| Applying the CbD 2.0 approach has increased the number of contexts in which we can work            | <input type="radio"/> | <input type="radio"/> | <input type="radio"/> | <input type="radio"/> |

**G7. Have you downloaded the CbD 2.0 Guidance document, which was released on March 2016?**

- ☐ Yes  
☐ No

**G8. Have you read all or part of the CbD 2.0 Guidance document, which was released on March 2016?**

- ☐ Read all  
☐ Read some  
☐ Did not read

#### Browser Meta Info

*This question will not be displayed to the recipient.*

Browser: **Firefox**

Version: **46.0**

Operating System: **Macintosh**

Screen Resolution: **1440x900**

Flash Version: **21.0.0**

Java Support: **1**

User Agent: **Mozilla/5.0 (Macintosh; Intel Mac OS X 10.11; rv:46.0) Gecko/20100101 Firefox/46.0**
